# Supplementary material
Source: MDPI journal article supplement (https://www.mdpi.com/2073-4441/12/9/2381)
Supplement: s1 [file s1]

# **A biosorption-pyrolysis process for removal of Pb from aqueous solution and subsequent immobilization of Pb in the char**

**Yue Wang, Jinhong Lü\*, Dongqing Feng, Sen Guo and Jianfa Li**

College of Chemistry and Chemical Engineering, Shaoxing University, Shaoxing  
Zhejiang, 312000, China; wangyue835@163.com (Y.W.); fengdongqing@yeah.net (D.F.);  
gsen1041@gmail.com (S.G.); ljf@usx.edu.cn (J.L.)

\* Correspondence: lvjinhong@usx.edu.cn; Tel.: +86-575-8834-1524

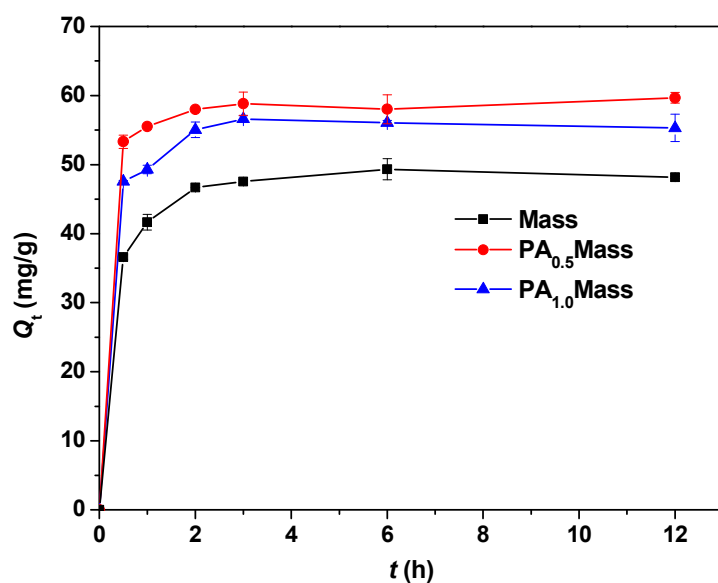

**Figure S1.** Change of the quantity of Pb adsorbed ( $Q_t$ ) by the three biosorbents (Mass, PA<sub>0.5</sub>Mass and PA<sub>1.0</sub>Mass) with the contact time ( $t$ ). The initial Pb concentration was 150 mg/L, and the initial pH was 5.0 for all the sorption experiments. The kinetic data was analyzed by fitting with the *pseudo*-second order model shown in the Eq. S1:

$$\frac{t}{Q_t} = \frac{1}{k \cdot Q_e^2} + \frac{t}{Q_e} \quad (\text{S1})$$

where  $Q_e$  stands for the simulated equilibrium adsorption (mg/g), and  $k$  is the sorption rate constant (g/(mg·h)). The fitting results are shown in Table S1.

**Table S1.** Parameters obtained by fitting the kinetic data (in Figure S1) with the *pseudo*-second order model (Eq. S1).

| Parameters             | $Q_e$ (mg/g) | $k$ (g/(mg·h)) | $R^2$ |
|------------------------|--------------|----------------|-------|
| Mass                   | 48.9         | 0.182          | 0.994 |
| PA <sub>0.5</sub> Mass | 59.8         | 0.208          | 0.998 |
| PA <sub>1.0</sub> Mass | 55.8         | 0.406          | 0.996 |

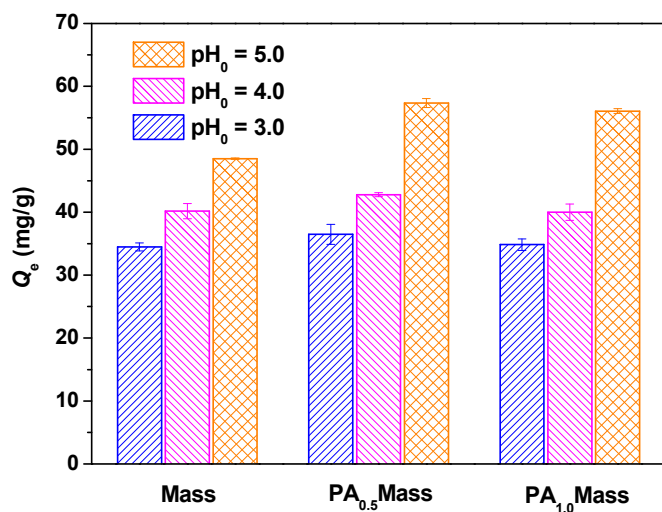

**Figure S2.** Change of the quantity of Pb adsorbed after equilibrium ( $Q_e$ ) with the initial pH ( $pH_0$ ). The initial Pb concentration was 150 mg/L, and the contact time was 6 h for all the sorption experiments. Here, only acidic pH (3.0–5.0) was tested, because a pH > 6.0 will lead to the precipitation of Pb in the form of  $Pb(OH)_2$  (Farooq U, et al. *Bioresour. Technol.* **2010**, 101, 5043-5053).

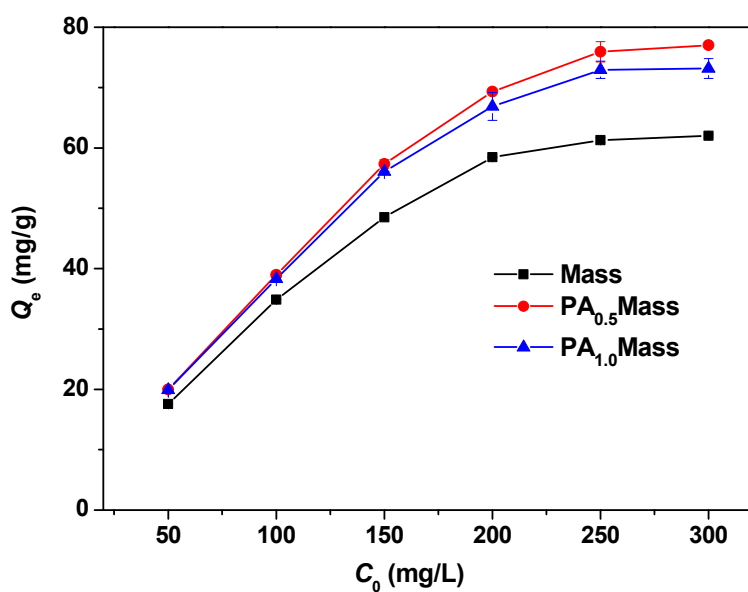

**Figure S3.** Change of the quantity of Pb adsorbed after equilibrium ( $Q_e$ ) with the initial concentration ( $C_0$ ). The initial pH was 5.0, and the contact time was 6 h for all the sorption experiments.
